# Supplementary material
Source: PubMed Central journal article supplement (PMC5617773)

Figure S1. A single systemic injection of TC-2153 increased ERK phosphorylation acutely within the PrL cortex of naïve rats. Naïve rats were either injected with TC-2153 (5 mg/kg i.p.,  $n=4$ ) or vehicle ( $n=4$ ), and were rapidly decapitated two hours later for analysis of p-ERK. A. Rats injected with TC-2153 showed increased p-ERK2/ERK2 relative to vehicle injected controls. B. There was no difference between the two groups in ERK2/Calnexin (\*  $p<0.05$ , unpaired two-tailed  $t$ -test).

**A**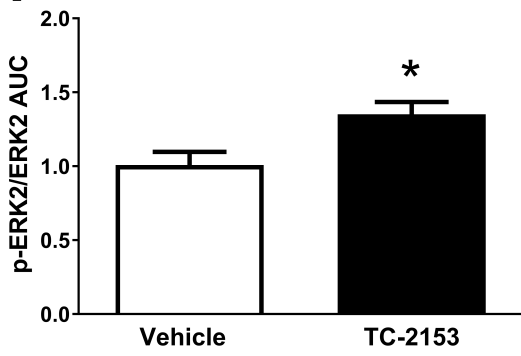**B**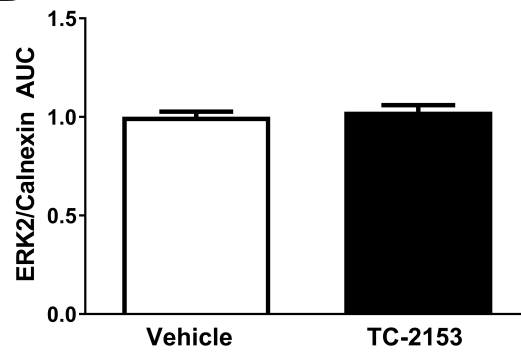

Supplement: NIHMS882798-supplement-SM.pdf [file NIHMS882798-supplement-SM.pdf]
